# Supplementary material for: Tuning the Biological Activity of Camphorimine Complexes through Metal Selection
Source: MDPI journal article supplement (doi:10.3390/antibiotics11081010), 2022-07-27
Supplement: s1 [file s1]

## SUPPLEMENTARY INFORMATION

### Tuning the biological activity of camphorimine complexes through metal selection

Joana P. Costa <sup>1</sup>, Teresa Pinheiro <sup>2</sup>, Maria S. Martins <sup>3,4</sup>, M. Fernanda N. N. Carvalho <sup>1,\*</sup>, Joana R. Feliciano <sup>5</sup>, Jorge H. Leitão <sup>5</sup>, Rafaela A. L. Silva <sup>3</sup>, Joana F. Guerreiro <sup>3</sup>, Luís M. C. Alves <sup>3</sup>, Inês Custódio <sup>3,4</sup>, João Cruz <sup>4</sup> and Fernanda Marques <sup>3,\*</sup>

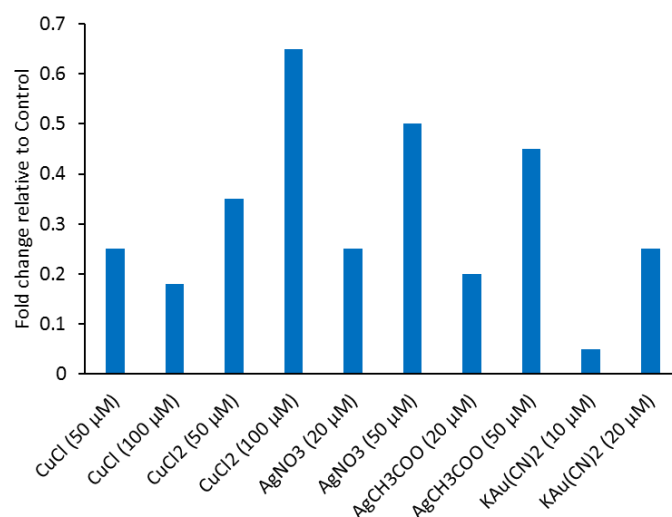

**Figure S1.** Production of ROS (relative to untreated cells) in OVCAR3 cells. Cells were treated with the metal precursors CuCl and CuCl<sub>2</sub> at 50 and 100 μM, AgNO<sub>3</sub> and AgCH<sub>3</sub>COO at 20 and 50 μM and KAu(CN)<sub>2</sub> at 10 and 20 μM using the H<sub>2</sub>DCFDA method.

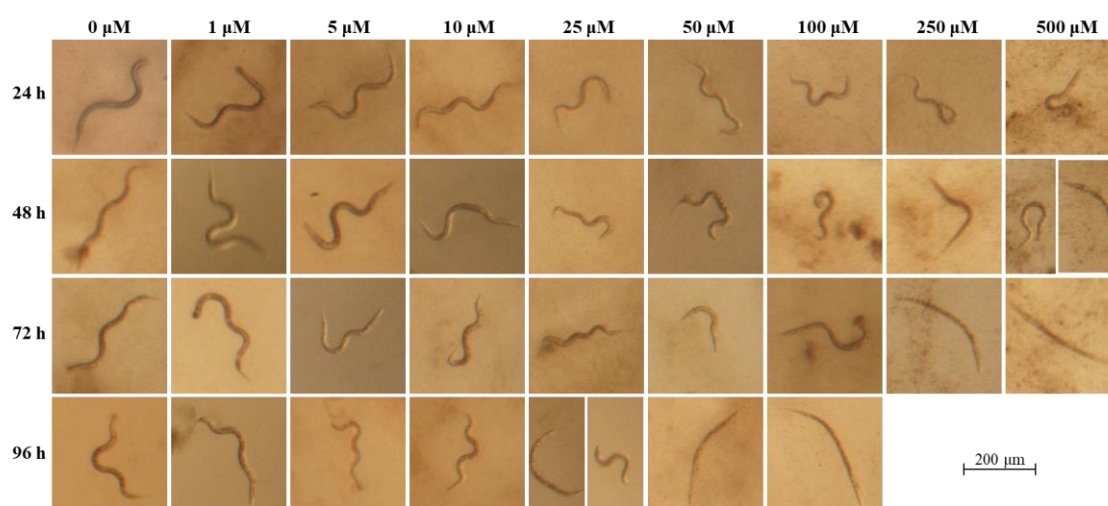

**Figure S2.** Toxicological evaluation of [Ag(NO<sub>3</sub>)(<sup>1</sup>A)<sub>2</sub>] (5) in the *C. elegans in vivo* model. Representative images of the *C. elegans* worms were captured after 24 h, 48 h, 72 h and 96 h of exposure to the indicated concentrations of the complex. Scale bars are 200 μm.
